# Supplementary material for: Towards mechanical characterization of granular biofilms by optical coherence elastography measurements of circumferential elastic waves
Source: Royal Society of Chemistry journal article supplement (doi:10.1039/c9sm00739c), 2019-01-01
Supplement: c9sm00739c2.pdf [file c9sm00739c2.pdf]

1 **Supplementary Information**

2  
3 **Towards Mechanical Characterization of Granular Biofilms by**  
4 **Optical Coherence Elastography Measurements of**  
5 **Circumferential Elastic Waves**

6  
7 *Hong-Cin Liou<sup>1</sup>, Fabrizio Sabba<sup>2</sup>, Aaron I. Packman<sup>2</sup>, Alex Rosenthal<sup>2</sup>, George Wells<sup>2</sup>,*  
8 *Oluwaseyi Balogun<sup>1,2\*</sup>*

9  
10  
11 <sup>1</sup>Mechanical Engineering Department, Northwestern University, Evanston, IL 60208

12 <sup>2</sup>Civil and Environmental Engineering Department, Northwestern University, Evanston, IL  
13 60208

14 **\*Corresponding author:**

15 Oluwaseyi Balogun, Phone: +1 847-491-3054; e-mail: [o-balogun@u.northwestern.edu](mailto:o-balogun@u.northwestern.edu)

16  
17  
18 **The following are included as supporting information for this paper:**

19 Number of pages: 8

20 Number of supplementary sections: 3

21 Number of figures: 2

22 Number of tables: 1

23

## 24 **S1 – Locating local minima in the $(\omega, k)$ space for the solutions of the characteristic equation**

25 The complex characteristic equation  $\det(\mathbf{S}) = 0$  (eqn 29) was solved by searching the solution pairs of  
26 angular frequency  $\omega = 2\pi f$  ( $f$  is frequency) and complex wavenumber  $k$  where the magnitude for the left-  
27 hand side of eqn (29) equals to zero, i.e.,  $|\det(\mathbf{S})| = 0$ . Note that it may be difficult to obtain absolute zero  
28 in numerical calculation; therefore, in practice, the solutions were determined instead by locating local  
29 minima of  $|\det(\mathbf{S})|$  in the  $(\omega, k)$  space. Specifically, the search of solutions includes the following steps: (1)  
30 choose a certain angular frequency  $\omega$  within the range of interest, (2) sweep a range of  $k$  to find the local  
31 minima, and (3) change to a different  $\omega$  and repeat step (2). For pure-elastic materials, the wavenumber  $k$   
32 only has the real part, so the sweep in step (2) was one-dimensional along the axis of real wavenumbers  $k^R$   
33  $= \text{Re}\{k\}$ . For viscoelastic materials,  $k$  is a complex number composed of the real ( $k^R$ ) and imaginary ( $k^I =$   
34  $\text{Im}\{k\}$ ) parts, so the sweep became two-dimensional over the  $(k^R, k^I)$  plane.

35 Figure S1a shows an example of  $|\det(\mathbf{S})|$  variation over the  $(k^R, k^I)$  space for a model viscoelastic  
36 material. The magnitude  $|\det(\mathbf{S})|$  is plotted in logarithmic scale for visualization purposes. The dent in the  
37 middle of the surface is one of the local minima of  $|\det(\mathbf{S})|$ , and the wavy wrinkles on the upper and lower  
38 sides of the surface are numerical errors. The wave wrinkles were confirmed to be numerical errors since  
39 they were also observed in the pure-elastic model material as shown in Fig. S1b. The pure-elastic material  
40 had the same properties as the viscoelastic material with the sole difference that the shear viscosity  $\eta_\mu$  was  
41 changed to zero. Since the wavenumber for the pure-elastic material only has the real part, the local minima  
42 should only appear on the  $k^I = 0$  axis.

43 To remove the numerical errors and identify the local minimum in Fig. S1a,  $|\det(\mathbf{S})|$  of the pure-  
44 elastic material (Fig. S1b) was subtracted from that of the viscoelastic material (Fig. S1a), yielding a clear  
45 inverted cone indicating the local minimum as shown in Fig. S2.

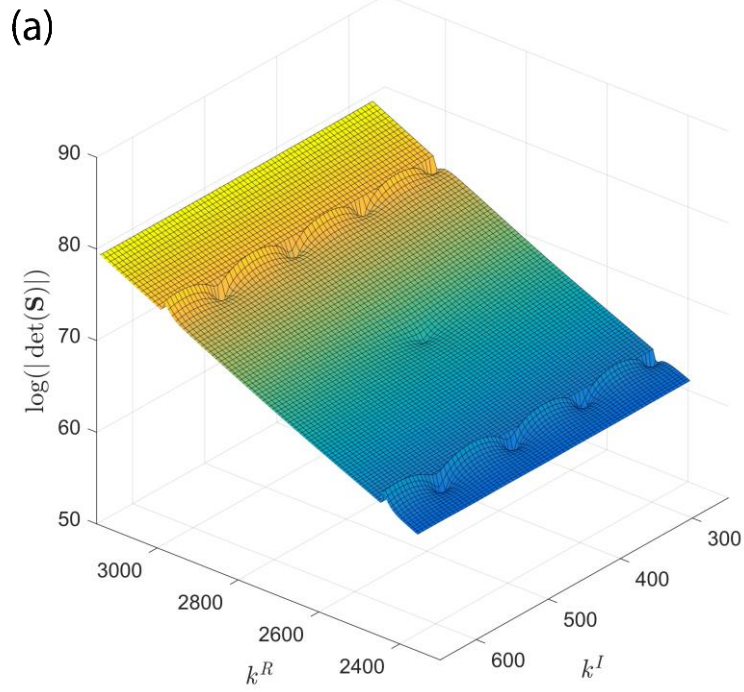

46

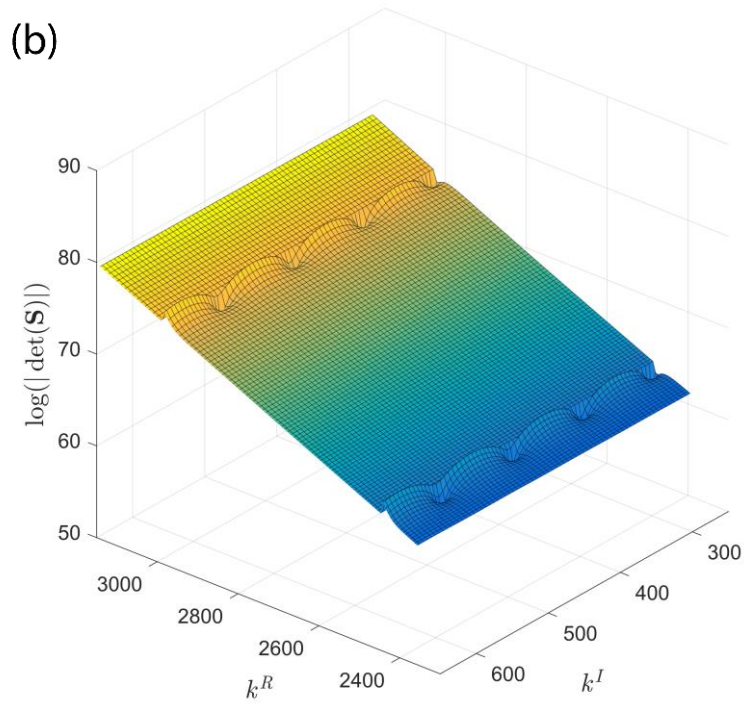

47

48 **Fig. S1:** Variation of the magnitude  $|\det(\mathbf{S})|$  over the  $(k^R, k^I)$  plane for model materials with (a) viscoelastic  
 49 properties and (b) pure-elastic properties. The wavy wrinkles observed both in (a) and (b), suggest that they  
 50 are numerical errors.

51

52

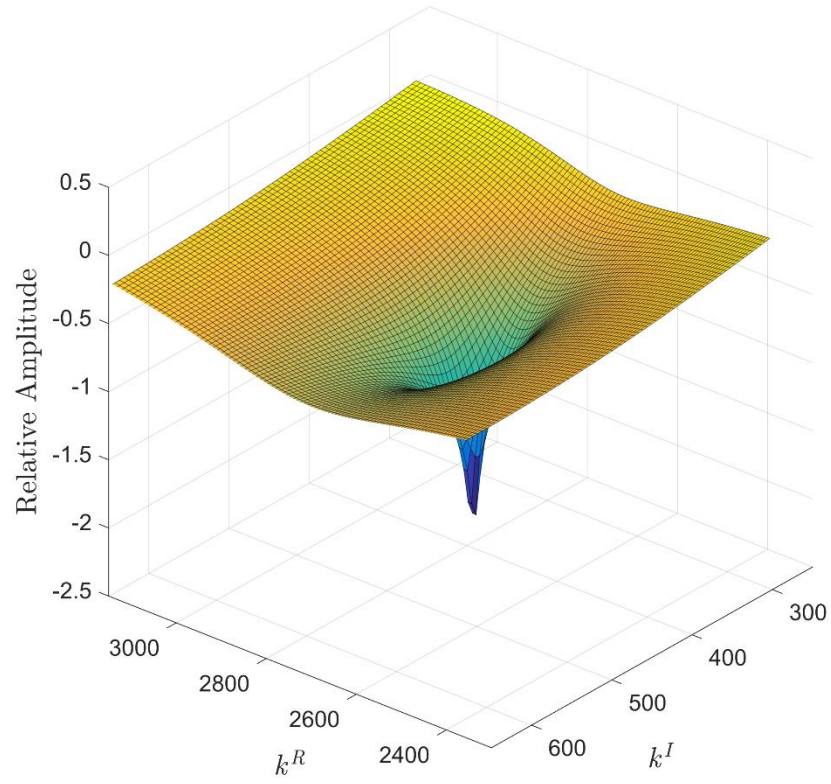

53

54 **Fig. S2:** Local minimum of  $|\det(\mathbf{S})|$  obtained by subtracting the  $|\det(\mathbf{S})|$  of the pure-elastic material (Fig.  
55 S1b) from that of the viscoelastic material (Fig. S1a).

56

57 **S2 – Simplified Characteristic Equation for the Elastic Curved Plate Reported in Liu and Qu (1998)**

58 The elastic curved plate reported in the article has traction-free condition for both sides of the plate, which  
59 corresponds to four boundary conditions: zero normal traction at the inner surface ( $r = a$ )  $\sigma_{rr}|_{r=a} = 0$ , ,  
60 zero normal traction at the outer surface ( $r = b$ ),  $\sigma_{rr}|_{r=b} = 0$ , zero shear traction at the inner surface,  
61  $\sigma_{r\theta}|_{r=a} = 0$ , and zero shear traction at the outer surface,  $\sigma_{r\theta}|_{r=b} = 0$ . These conditions lead to a four-by-  
62 four **S** matrix in eqn (28):

63 
$$\mathbf{S} = \begin{bmatrix} D_{31}|_{r=a} & D_{32}|_{r=a} & D_{33}|_{r=a} & D_{34}|_{r=a} \\ D_{31}|_{r=b} & D_{32}|_{r=b} & D_{33}|_{r=b} & D_{34}|_{r=b} \\ D_{41}|_{r=a} & D_{42}|_{r=a} & D_{43}|_{r=a} & D_{44}|_{r=a} \\ D_{41}|_{r=b} & D_{42}|_{r=b} & D_{43}|_{r=b} & D_{44}|_{r=b} \end{bmatrix} \quad (S7)$$

64

65

### 66 S3 – Numerical methods for calculating Bessel functions with complex orders

67 In eqn (14) and (15), the general solutions of the scalar and vector potential functions are linear  
68 superpositions of Bessel functions with a complex order  $\nu = kb$  as  $k$  is the complex wavenumber. A  
69 numerical challenge arises with the Bessel functions that have complex orders since they are not supported  
70 in MATLAB (Release R2016b, MathWorks). To resolve the challenge, this section provides the details of  
71 mathematical properties that enable the calculation of the approximate values for Bessel functions of this  
72 kind.

73 According to eqn (9.1.20) in *Handbook of Mathematical Functions with Formulas, Graphs, and*  
74 *Mathematical Tables* (Abramowitz and Stegun, 1964), the Bessel function of the first kind has the  
75 expression:

$$76 \quad J_\nu(z) = \frac{2\left(\frac{1}{2}z\right)^\nu}{\sqrt{\pi} \Gamma\left(\nu + \frac{1}{2}\right)} \int_0^1 (1-t^2)^{\nu-\frac{1}{2}} \cos(zt) dt, \quad \Re(\nu) > -\frac{1}{2} \quad (\text{S1})$$

77 where  $\nu$  and  $z$  are the order and the argument, respectively, of the Bessel function  $J$ , and  $\Gamma(x)$  is the Gamma  
78 function. In our case, the order  $\nu$  is the product of the complex wavenumber  $k$  and outer sphere radius  $b$ ,  
79 i.e.,  $\nu = kb$ , so that  $\nu$  is complex.

80 The recurrence relation (eqn 9.1.27 in Abramowitz and Stegun) can be used to extend the order of  
81 the Bessel function to the whole complex plane that is not covered in eqn (S1); i.e., use

$$82 \quad J_{\nu-1}(z) + J_{\nu+1}(z) = \frac{2\nu}{z} J_\nu(z) \quad (\text{S2})$$

83 for  $\Re(\nu) \leq -1/2$ .

84 In addition, the Bessel function of the second kind  $Y_\nu(z)$  is also required in our theoretical model,  
85 which has the relationship with the first kind (eqn 9.1.2 in Abramowitz and Stegun) given by

$$86 \quad Y_\nu(z) = \frac{J_\nu(z) \cos(\nu\pi) - J_{-\nu}(z)}{\sin(\nu\pi)} \quad (\text{S3})$$

87 Note that the Gamma function in eqn (S1) has a complex argument  $\nu + 1/2$ ; therefore, the value of  
88 Gamma function must be determined through the definition of integral form (6.1.1 in Abramowitz and  
89 Stegun):

90 
$$\Gamma(x) = \int_0^{\infty} t^{x-1} e^{-t} dt, \mathbb{R}(x) > 0 \quad (S4)$$

91 Eqn (S4) can be calculated using the Upper Incomplete Gamma Function `igamma` provided in  
92 MATLAB function library; however, the calculation speed of this approximation might be slow. An  
93 alternative method with enhanced calculation speed to acquire the approximate values of the Gamma  
94 function with complex argument can be found in an algorithm library created by Paul Godfrey  
95 (<http://my.fit.edu/~gabdo/paulbio.html>).

96 Similar to the Bessel functions, the recurrence relation of the Gamma function (eqn 6.1.15 in  
97 Abramowitz and Stegun) can be used to extend the argument of the Gamma function to the whole complex  
98 plane that is not covered in eqn (S4); i.e., use

99 
$$\Gamma(x + 1) = x\Gamma(x) \quad (S5)$$

100 for  $\mathbb{R}(x) \leq 0$ .

101 With eqn (S1) to (S5), the Hankel function of the first kind that represents the waves propagating  
102 along the positive  $r$ -direction can be obtained by the relationship with the Bessel functions:

103 
$$H_{\nu}^{(1)}(z) = J_{\nu}(z) + iY_{\nu}(z) \quad (S6)$$

104 Hence, all required functions are defined.

105 To validate the two aforementioned approximations of Gamma function (Upper Incomplete  
106 Gamma Function `igamma` in MATLAB function library and the program created by Godfrey), Bessel  
107 functions  $J_{\nu}(z)$  and  $Y_{\nu}(z)$  with different complex orders  $\nu$  and real arguments  $z$  were calculated and compared  
108 to the values reported in a reference (K. L. J. Fong, *A Study of Curvature Effects on Guided Elastic Waves*,  
109 Ph.D. thesis of Imperial College London, pp. 148). The comparison is demonstrated in Table S1, and the  
110 results show both approximations have at least 10 digits of precision compared to the reference.

111

| $J_\nu(z)$ with $\nu = 30 + 50i$ |                                                                           |                                                                                                               |                                                                                                               |
|----------------------------------|---------------------------------------------------------------------------|---------------------------------------------------------------------------------------------------------------|---------------------------------------------------------------------------------------------------------------|
| $z$                              | Reference                                                                 | MATLAB igamma                                                                                                 | Godfrey                                                                                                       |
| 70                               | $-5.93644837574622 \times 10^{23}$<br>$-6.21989546226278 \times 10^{23}i$ | <b><math>-5.93644837574486 \times 10^{23}</math></b><br><b><math>-6.21989546226806 \times 10^{23}i</math></b> | <b><math>-5.93644837574481 \times 10^{23}</math></b><br><b><math>-6.21989546226825 \times 10^{23}i</math></b> |
| 31                               | $9.38713109974277 \times 10^{15}$<br>$-2.04157148369613 \times 10^{15}i$  | <b><math>9.38713109974298 \times 10^{15}</math></b><br><b><math>-2.04157148369613 \times 10^{15}i</math></b>  | <b><math>9.38713109974313 \times 10^{15}</math></b><br><b><math>-2.04157148369597 \times 10^{15}i</math></b>  |
| 30                               | $-1.95359736621662 \times 10^{15}$<br>$-3.54953866450241 \times 10^{15}i$ | <b><math>-1.95359736621663 \times 10^{15}</math></b><br><b><math>-3.54953866450250 \times 10^{15}i</math></b> | <b><math>-1.95359736621659 \times 10^{15}</math></b><br><b><math>-3.54953866450258 \times 10^{15}i</math></b> |
| 10                               | $-102.750648203869$<br>$+21.6604279770704i$                               | <b><math>-102.750648203871</math></b><br><b><math>+21.6604279770701i</math></b>                               | <b><math>-102.750648203873</math></b><br><b><math>+21.6604279770684i</math></b>                               |
| $Y_\nu(z)$ with $\nu = 30 + 50i$ |                                                                           |                                                                                                               |                                                                                                               |
| $z$                              | Reference                                                                 | MATLAB igamma                                                                                                 | Godfrey                                                                                                       |
| 70                               | $-6.21989546226278 \times 10^{23}$<br>$+5.93644837574622 \times 10^{23}i$ | <b><math>-6.21989546226806 \times 10^{23}</math></b><br><b><math>+5.93644837574486 \times 10^{23}i</math></b> | <b><math>-6.21989546226825 \times 10^{23}</math></b><br><b><math>+5.93644837574481 \times 10^{23}i</math></b> |
| 31                               | $-2.04157148369613 \times 10^{15}$<br>$-9.38713109974277 \times 10^{15}i$ | <b><math>-2.04157148369613 \times 10^{15}</math></b><br><b><math>-9.38713109974298 \times 10^{15}i</math></b> | <b><math>-2.04157148369597 \times 10^{15}</math></b><br><b><math>-9.38713109974313 \times 10^{15}i</math></b> |
| 30                               | $-3.54953866450241 \times 10^{15}$<br>$+1.95359736621662 \times 10^{15}i$ | <b><math>-3.54953866450250 \times 10^{15}</math></b><br><b><math>+1.95359736621663 \times 10^{15}i</math></b> | <b><math>-3.54953866450258 \times 10^{15}</math></b><br><b><math>+1.95359736621659 \times 10^{15}i</math></b> |
| 10                               | $21.6604626085221$<br>$+102.750609923256i$                                | <b><math>21.6604626098798</math></b><br><b><math>+102.750609922708i</math></b>                                | <b><math>21.6604626098782</math></b><br><b><math>+102.750609922709</math></b>                                 |

112 **Table S1:** Numerical values of Bessel functions  $J_\nu(z)$  and  $Y_\nu(z)$  calculated by three different algorithms.  
113 Bolded numbers indicate the consistent digits with the reference.

114
